# Supplementary material for: Influence of Dietary Ingredients on Lean Body Percent, Uremic Toxin Concentrations, and Kidney Function in Senior-Adult Cats
Source: PubMed Central journal article supplement (PMC6836002; doi:10.3390/metabo9100238), 2019-10-19
Supplement: metabolites-09-00238-s001.pdf [file metabolites-09-00238-s001.pdf]

**Table S1.** Determination of whether the change from baseline for a metabolite class (glutathione pathway, methylation, and microbial postbiotics) differed across the study groups was performed by multivariate analysis of variance (MANOVA) using the Identity Function, which fits a model for each metabolite individually and then jointly tests the models together. Shown here are the separate MANOVA *P* values for Wilks' Lambda, Pillai's Trace, Hotelling-Lawley, and Roy's Max Root.

| <b>Pathway MANOVA</b> |       |           |       |       |          |
|-----------------------|-------|-----------|-------|-------|----------|
| MANOVA Glutathione    |       |           |       |       |          |
| Test                  | Value | Approx. F | NumDF | DenDF | Prob > F |
| Wilks' Lambda         | 0.43  | 3.93      | 10    | 74    | 2.6E-04  |
| Pillai's Trace        | 0.67  | 3.81      | 10    | 76    | 3.4E-04  |
| Hotelling-Lawley      | 1.12  | 4.08      | 10    | 52.8  | 3.5E-04  |
| Roy's Max Root        | 0.86  | 6.57      | 5     | 38    | 1.7E-04  |
| MANOVA Methylation    |       |           |       |       |          |
| Test                  | Value | Approx. F | NumDF | DenDF | Prob>F   |
| Wilks' Lambda         | 0.07  | 14.51     | 14    | 70    | 1.6E-15  |
| Pillai's Trace        | 1.44  | 13.19     | 14    | 72    | 1.0E-14  |
| Hotelling-Lawley      | 6.54  | 16.03     | 14    | 52.7  | 2.9E-14  |
| Roy's Max Root        | 5.01  | 25.76     | 7     | 36    | 3.3E-12  |
| MANOVA Postbiotics    |       |           |       |       |          |
| Test                  | Value | Approx. F | NumDF | DenDF | Prob>F   |
| Wilks' Lambda         | 0.09  | 2.85      | 38    | 46    | 4.0E-04  |
| Pillai's Trace        | 1.21  | 1.93      | 38    | 48    | 0.02     |
| Hotelling-Lawley      | 6.91  | 4.03      | 38    | 37.3  | 2.2E-05  |
| Roy's Max Root        | 6.38  | 8.06      | 19    | 24    | 2.4E-06  |

**Table S2.** The Sparse Partial Least Squares Analysis (SPLS) indicated that there were differences between the groups' changes from baseline, with a greater separation between control and both FF1 and FF2 than between FF1 and FF2. Component 1 of the SPLS loadings segregated control from FF1, whereas component 2 segregated control and FF1 from FF2. Revealingly, SPLS component 1 contained metabolites associated with glutathione metabolism, methylation capacity, and microbial postbiotic production.

| <b>Metabolite</b>                | <b>SPLS</b>                 |                             |      |
|----------------------------------|-----------------------------|-----------------------------|------|
|                                  | <b>Component 1 Loadings</b> | <b>Component 2 Loadings</b> |      |
| trigonelline N'-methylnicotinate | 0.55                        | fucosterol                  | 0.29 |
| 5-methylcytidine                 | 0.46                        | bradykinin, des-arg9        | 0.25 |
| homoarginine                     | 0.23                        | carnitine                   | 0.25 |
| cytidine                         | 0.10                        | oleoyltaurine               | 0.23 |
| 5-methylcytosine                 | 0.08                        | leucine                     | 0.21 |
| ophthalmate                      | -0.02                       | serotonin 5HT               | 0.20 |
| 1-arachidonoyl-GPE 204           | -0.03                       | tetradecanedioate C14       | 0.19 |
| cinnamoylglycine                 | -0.06                       | isoleucine                  | 0.13 |
| 3-dehydrocarnitine               | -0.11                       | bradykinin                  | 0.09 |
| gamma-glutamylalanine            | -0.12                       | 5-oxoproline                | 0.05 |
| gamma-glutamylisoleucine         | -0.15                       | valine                      | 0.05 |
| imidazole propionate             | -0.16                       | AMP                         | 0.03 |
| hippurate                        | -0.17                       | inosine                     | 0.02 |

|                                |       |                         |          |
|--------------------------------|-------|-------------------------|----------|
| gamma-glutamylvaline           | -0.17 | linoleate 182n6         | -2.7E-03 |
| isovalerylcarnitine C5         | -0.17 | pseudouridine           | -0.09    |
| alpha-hydroxyisovalerate       | -0.17 | 13-HODE 9-HODE          | -0.18    |
| gamma-glutamylleucine          | -0.17 | behenate 220            | -0.20    |
| stachydrine                    | -0.22 | linolenate 183n3 or 3n6 | -0.22    |
| 3-4-hydroxyphenyllactate HPLA  | -0.27 | thymol sulfate          | -0.42    |
| hydroxyisovaleroylcarnitine C5 | -0.27 | betaine                 | -0.53    |

---

**Table S3.** Random Forest analysis provided discrimination between the dietary groups with an overall out of bounds class error of 4.6%, where 14/15 cats were correctly assigned to the control group with one cat misclassified as belonging to the FF1 group (class error 6.7%), 14/15 cats were correctly assigned to the FF1 group with one misclassified into the FF2 group (class error 6.7%), and all cats (14/14) correctly classified in the FF2 group. Metabolites associated with methylation capacity and microbial postbiotic production were featured, although glutathione metabolism was not featured as prominently.

| Metabolite                        | Mean Decrease Accuracy | Metabolite                  | Mean Decrease Accuracy | Metabolite                  | Mean Decrease Accuracy |
|-----------------------------------|------------------------|-----------------------------|------------------------|-----------------------------|------------------------|
| trigonelline N'-methylnicotinate  | 0.036754               | xylose                      | 0.000197               | alpha-hydroxyisocaproate    | -3.96E-05              |
| 5-methylcytidine                  | 0.023885               | 5-oxoproline                | 0.000188               | vaccenate 181n7             | -4.07E-05              |
| hydroxyisovaleroylcarnitine C5    | 0.021344               | 1-docosapentaenoyl-GPC 225  | 0.000186               | 1-arachidoyl-GPC 200        | -4.72E-05              |
| homoarginine                      | 0.021147               | gamma-glutamylphenylalanine | 0.000184               | 1-methylguanosine           | -5.07E-05              |
| betaine                           | 0.01719                | threitol                    | 0.000181               | 2-methylbutyrylcarnitine C5 | -5.11E-05              |
| thymol sulfate                    | 0.016888               | N-acetyl-beta-alanine       | 0.000181               | serine                      | -5.14E-05              |
| imidazole propionate              | 0.015623               | 1-stearoylglycerol 180      | 0.00018                | citrate                     | -5.24E-05              |
| hippurate                         | 0.014121               | cholate                     | 0.000171               | ergothioneine               | -5.42E-05              |
| isovalerylcarnitine C5            | 0.0075012              | erythronate                 | 0.000169               | 1-stearoyl-GPI 180          | -5.47E-05              |
| 3-4-hydroxyphenyllactate HPLA     | 0.006994               | phenylacetate               | 0.000165               | N-acetyltryptophan          | -5.49E-05              |
| fucosterol                        | 0.0058405              | 1-eicosatrienoyl-GPC 203    | 0.000162               | N-palmitoyl taurine         | -5.59E-05              |
| 5-methylcytosine                  | 0.0051102              | malate                      | 0.000161               | EDTA                        | -5.60E-05              |
| 1-arachidonoyl-GPE 204            | 0.0048562              | 1-stearoyl-GPE 180          | 0.00016                | caprylate 80                | -6.00E-05              |
| alpha-hydroxyisovalerate          | 0.0042711              | cycloleu-pro                | 0.00016                | glycerol 3-phosphate G3P    | -6.01E-05              |
| gamma-glutamylvaline              | 0.0042582              | indolelactate               | 0.000144               | N2-methylguanosine          | -6.02E-05              |
| cinnamoylglycine                  | 0.0041425              | eicosenoate 201n9 or 1n11   | 0.000143               | palmitate 160               | -6.07E-05              |
| gamma-glutamylleucine             | 0.0038401              | alpha-tocopherol            | 0.000132               | 1-oleoyl-GPC 181            | -6.21E-05              |
| stachydrine                       | 0.0037471              | N-formylmethionine          | 0.000131               | indoleacetate               | -6.22E-05              |
| 3-dehydrocarnitine                | 0.0035832              | 2-stearoyl-GPC 180          | 0.000129               | arginine                    | -6.29E-05              |
| cytidine                          | 0.0032225              | undecanoate 110             | 0.000123               | pyruvate                    | -6.35E-05              |
| 5-hydroxymethylcytosine           | 0.0031058              | 1-eicosadienoyl-GPC 202     | 0.000123               | methionine                  | -6.68E-05              |
| carnitine                         | 0.0027608              | 3-hydroxy-2-ethylpropionate | 0.000123               | erythrose                   | -6.86E-05              |
| glycerate                         | 0.0027205              | alpha-ketoglutarate         | 0.00012                | pyridoxate                  | -7.06E-05              |
| 2-oxindole-3-acetate              | 0.0025502              | arachidate 200              | 0.000119               | asparagine                  | -7.14E-05              |
| linolenate 183n3 or 3n6           | 0.0024283              | anserine                    | 0.000112               | 3-ureidopropionate          | -7.20E-05              |
| gamma-tocopherol                  | 0.0021365              | laurate 120                 | 0.000107               | 1-stearoyl-GPC 180          | -7.21E-05              |
| bradykinin                        | 0.0020536              | phenol sulfate              | 0.000104               | glucose                     | -7.22E-05              |
| 3-phenylpropionate hydrocinnamate | 0.001995               | 1-methylimidazoleacetate    | 0.000104               | dimethylarginine ADMA SDMA  | -7.23E-05              |
| gamma-glutamylisoleucine          | 0.0019409              | 3-hydroxyisobutyrate        | 8.87E-05               | margarate 170               | -7.27E-05              |
| serotonin 5HT                     | 0.0019371              | 1-arachidonoyl-GPC 204      | 8.72E-05               | kynurenate                  | -7.29E-05              |
| delta-tocopherol                  | 0.0018924              | trans-urocanate             | 8.70E-05               | threonine                   | -7.31E-05              |

|                                 |            |                             |          |                               |           |
|---------------------------------|------------|-----------------------------|----------|-------------------------------|-----------|
| glutathione, oxidized GSSG      | 0.0018917  | heme                        | 8.53E-05 | valerylcarnitine C5           | -7.32E-05 |
| 2'-deoxycytidine                | 0.0018665  | indoleacrylate              | 8.09E-05 | 3-aminoisobutyrate            | -7.75E-05 |
| behenate 220                    | 0.0018511  | pelargonate 90              | 7.30E-05 | docosapentaenoate DPA 225n3   | -7.78E-05 |
| eicosapentaenoate EPA 205n3     | 0.001701   | catechol sulfate            | 6.65E-05 | phenylacetylglutamine         | -8.17E-05 |
| inosine                         | 0.0016452  | cysteine                    | 6.59E-05 | 1-methylhistidine             | -8.24E-05 |
| 5-methyl-2'-deoxycytidine       | 0.0016369  | lactate                     | 6.33E-05 | 2-ethylhexanoic acid          | -8.26E-05 |
| valine                          | 0.001503   | alpha-ketobutyrate          | 6.06E-05 | myristate 140                 | -8.41E-05 |
| gamma-glutamylalanine phosphate | 0.0014883  | 2-linoleoyl-GPE 182         | 5.99E-05 | 3-hydroxybutyrate BHBA        | -8.42E-05 |
| pyroglutamine                   | 0.0013249  | felinine                    | 5.81E-05 | eicosanodioate                | -8.52E-05 |
| 13-HODE 9-HODE                  | 0.0013196  | dihydroxyacetone            | 5.53E-05 | ornithine                     | -8.67E-05 |
| iminodiacetate IDA              | 0.0012028  | docosadienoate 222n6        | 5.48E-05 | succinate                     | -8.69E-05 |
| creatine                        | 0.0011992  | adrenate 224n6              | 5.36E-05 | 2-oleoyl-GPC 181              | -8.76E-05 |
| gamma-glutamylthreonine         | 0.0011722  | 10-heptadecenoate 171n7     | 5.03E-05 | 2-hydroxystearate             | -8.88E-05 |
| ophthalmate                     | 0.0011343  | sarcosine N-Methylglycine   | 4.88E-05 | citrulline                    | -9.00E-05 |
| cysteine-glutathione disulfide  | 0.00105    | acetylcarnitine C2          | 4.87E-05 | N-acetylaspartate NAA         | -9.06E-05 |
| bradykinin, des-arg9            | 0.0010095  | methylphosphate             | 4.56E-05 | histidine                     | -9.23E-05 |
| glycerol                        | 0.00096303 | N-acetylmethionine          | 4.15E-05 | cholesterol                   | -9.54E-05 |
| hexanoylcarnitine C6            | 0.00095577 | prolylhydroxyproline        | 3.97E-05 | creatinine                    | -9.59E-05 |
| alanine                         | 0.000815   | cortisol                    | 3.91E-05 | homocitrulline                | -9.66E-05 |
| phenylpropionylglycine          | 0.00079655 | glutaroylcarnitine C5       | 3.41E-05 | pantothenate Vitamin B5       | -9.69E-05 |
| beta-hydroxyisovalerate         | 0.00076648 | indolepropionate            | 3.40E-05 | C-glycosyltryptophan          | -9.83E-05 |
| tetradecanedioate C14           | 0.00075494 | 3-4-hydroxyphenylpropionate | 3.38E-05 | 1-linoleoyl-GPE 182           | -0.0001   |
| isoleucine                      | 0.00075064 | 1-palmitoylglycerol 160     | 3.28E-05 | 4-methyl-2-oxopentanoate      | -0.0001   |
| arachidonate 204n6              | 0.00073123 | glutamine                   | 3.21E-05 | fumarate                      | -0.0001   |
| 2-palmitoyl-GPE 160             | 0.00069695 | cortisone                   | 3.18E-05 | beta-sitosterol               | -0.00011  |
| butyrylcarnitine C4             | 0.00064301 | allantoin                   | 2.84E-05 | mannose                       | -0.00011  |
| 1-oleoyl-GPE 181                | 0.00063363 | valerate 50                 | 2.81E-05 | tyramine                      | -0.00011  |
| 1-palmitoyl-GPE 160             | 0.0006287  | 2-arachidonoyl-GPC 204      | 2.72E-05 | 5-methylthioadenosine MTA     | -0.00011  |
| propionylcarnitine C3           | 0.00060337 | phenylacetyl glycine        | 2.70E-05 | carnosine                     | -0.00012  |
| AMP                             | 0.0005976  | 2-hydroxyphenylacetate      | 2.67E-05 | 4-acetamidobutanoate          | -0.00012  |
| leucine                         | 0.00056768 | 4-hydroxyhippurate          | 2.60E-05 | gamma-glutamylglutamine       | -0.00012  |
| 2-hydroxyisobutyrate            | 0.00056095 | azelate nonanedioate C9     | 2.15E-05 | 2-oleoyl-GPE 181              | -0.00012  |
| tryptophan                      | 0.0005047  | xylonate                    | 2.15E-05 | 1-myristoyl-GPC 140           | -0.00013  |
| isobutyrylcarnitine C4          | 0.00049698 | pyrophosphate PPi           | 1.97E-05 | dihomolinolenate 203n3 or 3n6 | -0.00013  |
| tyrosine                        | 0.00048093 | nonadecanoate 190           | 1.89E-05 | 3-methyl-2-oxovalerate        | -0.00013  |
| homocysteine                    | 0.00047713 | 12-HETE                     | 1.81E-05 | 1-heptadecanoyl-GPC 170       | -0.00013  |
| oleoyltaurine                   | 0.0004671  | 3-indoxyl sulfate           | 1.51E-05 | caproate 60                   | -0.00013  |
| 12,13-hydroxyoctadec-9Z-enoate  | 0.00042863 | 1-linoleoyl-GPC 182         | 1.49E-05 | 3-methylhistidine             | -0.00013  |
| 7-HOCA                          | 0.0004204  | lysine                      | 1.48E-05 | caprate 100                   | -0.00013  |
| pseudouridine                   | 0.0004173  | N-acetylalanine             | 1.28E-05 | N-acetylthreonine             | -0.00014  |
| proline                         | 0.00040958 | docosahexaenoate DHA 226n3  | 9.99E-06 | choline                       | -0.00014  |
|                                 | 0.00040528 | 2-palmitoyl-GPC 160         | 7.76E-06 | stearate 180                  | -0.00014  |

|                                       |            |                                       |           |                                              |          |
|---------------------------------------|------------|---------------------------------------|-----------|----------------------------------------------|----------|
| phenylalanine                         | 0.00040108 | 7-methylguanine                       | 7.21E-06  | hydroxyproline                               | -0.00015 |
| succinylcarnitine C4                  | 0.00038315 | N4-acetylcytidine                     | 3.05E-06  | 2-hydroxypalmitate                           | -0.00015 |
| 10-nonadecenoate<br>191n9             | 0.00037211 | 1-docosaehaenoyl-<br>GPC 226          | 2.70E-06  | myristoleate 141n5                           | -0.00015 |
| isovalerate C5                        | 0.0003649  | deoxycarnitine                        | -1.75E-07 | octadecanedioate C18                         | -0.00016 |
| urate                                 | 0.00035394 | mannitol                              | -2.74E-07 | fructose                                     | -0.00016 |
| threonate                             | 0.00033444 | benzoate                              | -1.21E-06 | beta-hydroxypyruvate                         | -0.00016 |
| 2-hydroxybutyrate<br>AHB              | 0.00031613 | hypoxanthine                          | -1.69E-06 | glycerol 2-phosphate                         | -0.00017 |
| linoleate 182n6                       | 0.00031584 | 2-linoleoyl-GPC 182                   | -1.87E-06 | pipecolate                                   | -0.00017 |
| 2-arachidonoyl-GPE<br>204             | 0.00030388 | levulinate 4-<br>oxovalerate          | -2.46E-06 | p-cresol sulfate                             | -0.00018 |
| phenyllactate PLA                     | 0.00030247 | uridine                               | -5.95E-06 | acetylphosphate                              | -0.00018 |
| kynurenine                            | 0.00029983 | 1-palmitoyl-GPC 160                   | -9.66E-06 | 2-hydroxyglutarate                           | -0.00019 |
| 1-methyladenosine                     | 0.00029981 | campesterol                           | -1.02E-05 | sebacate decanedioate                        | -0.00019 |
| 1-arachidonoyl-GPI<br>204             | 0.00028294 | urea                                  | -1.03E-05 | palmitoyl<br>sphingomyelin                   | -0.0002  |
| 3-methyl-2-<br>oxobutyrate            | 0.00026825 | N6-<br>carbamoylthreonylade<br>nosine | -1.19E-05 | heptanoate 70                                | -0.0002  |
| riboflavin Vitamin B2                 | 0.00025807 | erythritol                            | -1.24E-05 | myo-inositol                                 | -0.00021 |
| 3-<br>methylglutaroylcarniti<br>ne C6 | 0.00025278 | lathosterol                           | -1.37E-05 | gamma-<br>glutamyltryptophan                 | -0.00022 |
| gamma-<br>glutamyltyrosine            | 0.00025103 | oleate 181n9                          | -1.57E-05 | palmitoleate 161n7                           | -0.00022 |
| N-acetylmethionine                    | 0.00025094 | gamma-<br>glutamylmethionine          | -2.23E-05 | gluconate                                    | -0.00022 |
| hexadecanedioate C16                  | 0.00024559 | N-acetyls erine                       | -2.29E-05 | 1-<br>pentadecanoylglycero<br>phosphocholine | -0.00034 |
| tiglyl carnitine C5                   | 0.00023144 | glycine                               | -2.35E-05 |                                              |          |
| stearidonate 184n3                    | 0.00022645 | 1-palmitoleoyl-GPC<br>161             | -2.66E-05 |                                              |          |
| docosapentaenoate n6<br>DPA 225n6     | 0.00021689 | 2-aminobutyrate                       | -2.77E-05 |                                              |          |
| gamma-<br>glutamylglycine             | 0.00021396 | 2-hydroxy-3-<br>methylvalerate        | -2.90E-05 |                                              |          |
| 3-ethylphenylsulfate                  | 0.00021164 | nicotinamide                          | -2.94E-05 |                                              |          |
| gamma-<br>glutamylfelinylglycine      | 0.00020326 | glutamate                             | -3.00E-05 |                                              |          |
| dihomolinoleate 202n6                 | 0.00019753 | 3-hydroxydecanoate                    | -3.03E-05 |                                              |          |
| xylose                                | 0.00019732 | gulono-1,4-lactone                    | -3.90E-05 |                                              |          |
